# Supplementary material for: Bacterial diversity in the jelly of shark Ampullae of Lorenzini: a holobiont perspective
Source: PeerJ journal article supplement (doi:10.7717/peerj.20461), 2026-01-05
Supplement: Table_S2.pdf [file Table_S2.pdf]

**Table S2. Categories of *Exiguobacterium* Genes Related to Colonization in the AoL of Sharks**

| <b>Virulence or<br/>colonization factors</b> | <b>Genes of <i>Exiguobacterium</i></b>         |
|----------------------------------------------|------------------------------------------------|
| Adherence                                    | groEL                                          |
| Adherence                                    | lap                                            |
| Adherence                                    | plr/gapA                                       |
| Antiphagocytosis                             | rmIB                                           |
| Antiphagocytosis                             | wbjD                                           |
| Antiphagocytosis                             | Capsule(Enterococcus)                          |
| Chemotaxis and motility                      | uge                                            |
| Chemotaxis and motility                      | fli/I,P                                        |
| Enzyme                                       | eno                                            |
| Enzyme                                       | Immune inhibitor A metalloproteinase(Bacillus) |
| Iron uptake                                  | viuC                                           |
| Iron uptake                                  | fagB                                           |
| Iron uptake                                  | hemL                                           |
| Iron uptake                                  | piaA                                           |
| Secretion system                             | fliQ                                           |
| Secretion system                             | T6SS-II(Klebsiella)                            |
| Toxin                                        | cylR2                                          |
| Secretion system                             | hlyIII                                         |
| Secretion system                             | Hemolysin III homolog(Bacillus)                |
| Secretion system                             | Hemolysin(Clostridium)                         |
| Cell surface components                      | sugC                                           |
| Copper uptake                                | ctpV                                           |
| Immune evasion                               | cap/F,O                                        |
| Immune evasion                               | wbt/B,E,I                                      |
| Immune evasion                               | fabZ                                           |
| Immune evasion                               | Polysaccharide capsule(Bacillus)               |
| Immune evasion                               | galU                                           |
| Intracellular survival                       | lplA1                                          |
| Lipid and fatty acid<br>metabolism           | icl                                            |
| Lipid and fatty acid<br>metabolism           | panD                                           |
| Phagosome arresting                          | ndk                                            |
| Regulation                                   | csrA                                           |
| Regulation                                   | cheY                                           |
| Regulation                                   | sigA/rpoV                                      |
| Serum resistance and<br>immune evasion       | lgt                                            |
| Surface protein anchoring                    | lspA                                           |
